# Supplementary material
Source: PubMed Central journal article supplement (PMC6955453)
Supplement: Supplemental_Material.pdf [file Supplemental_Material.pdf]

## Supplemental Material

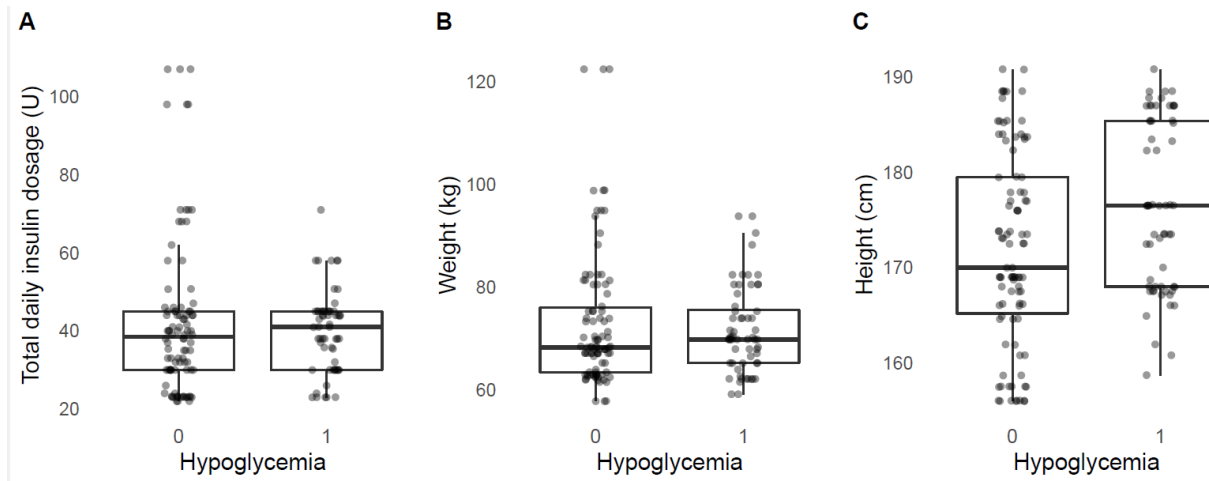

Supplemental Figure 1: Anthropomorphic features as evaluated across hypoglycemia and non-hypoglycemia events.

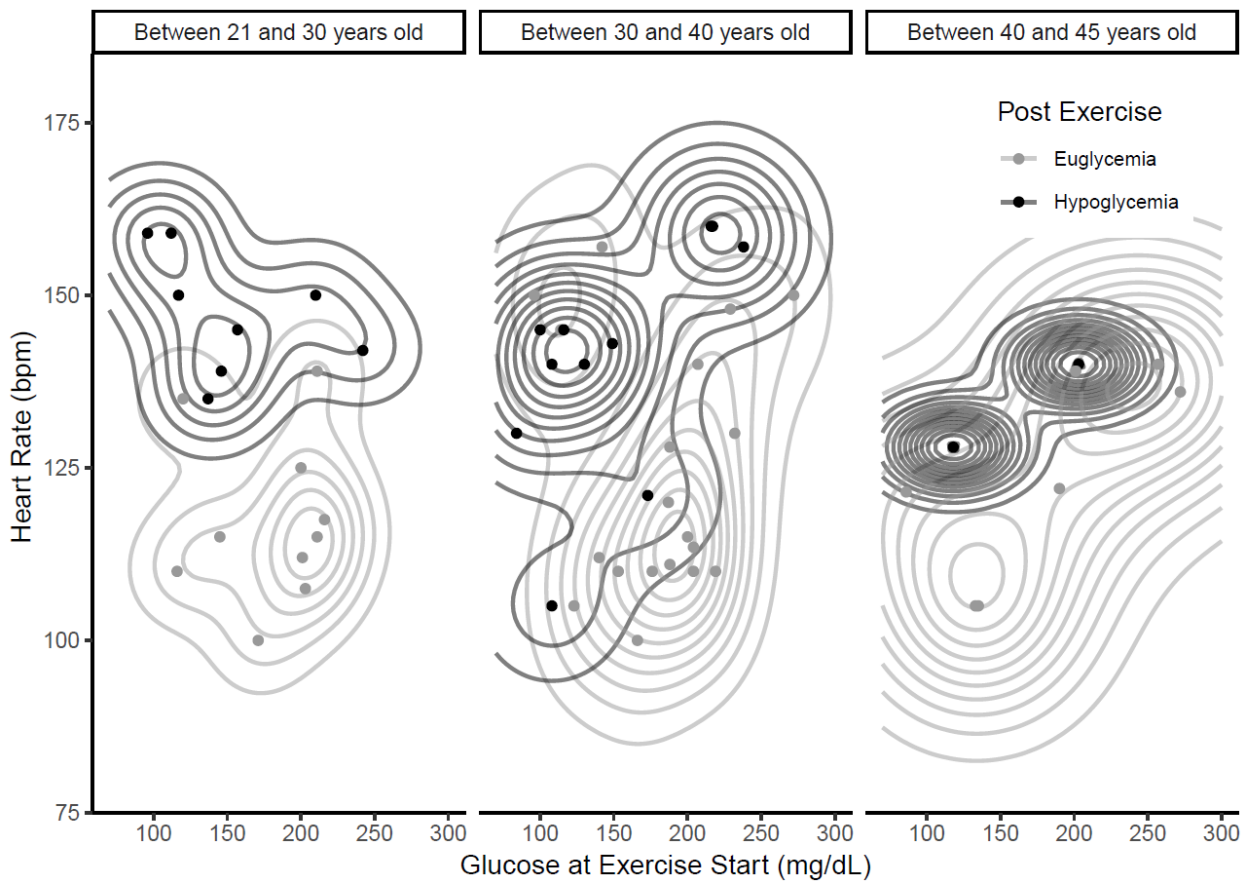

Supplemental Figure 2: Relationship between age and the key predictors in the 180/120 rule (heart rate during first 5 minutes of exercise, and glucose at the start of exercise). Notice that age does not result in a significant shift in the predictors as they relate to hypoglycemia and non-hypoglycemia events.
